# Supplementary material for: Detection of azole-resistant Aspergillus fumigatus in the environment from air, plant debris, compost, and soil
Source: PubMed Central journal article supplement (PMC9983824; doi:10.1371/journal.pone.0282499), 2023-03-03
Supplement: pone.0282499.s005.pdf [file pone.0282499.s005.pdf]

Fig. 1

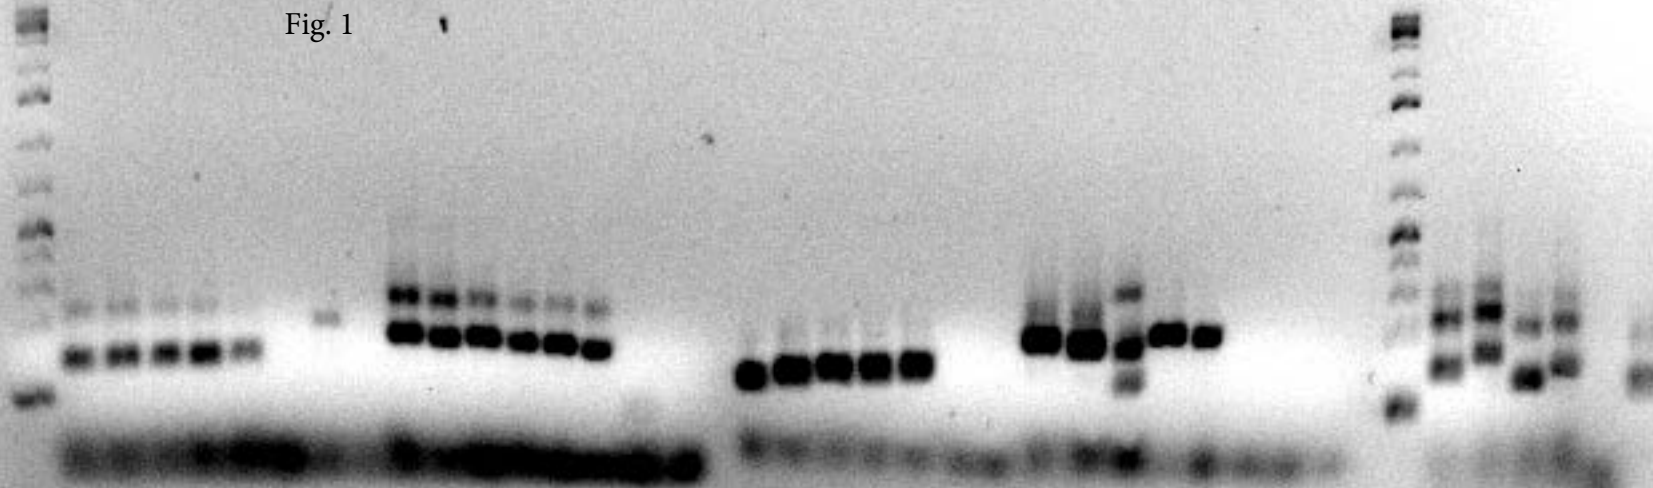

Fig. 2A

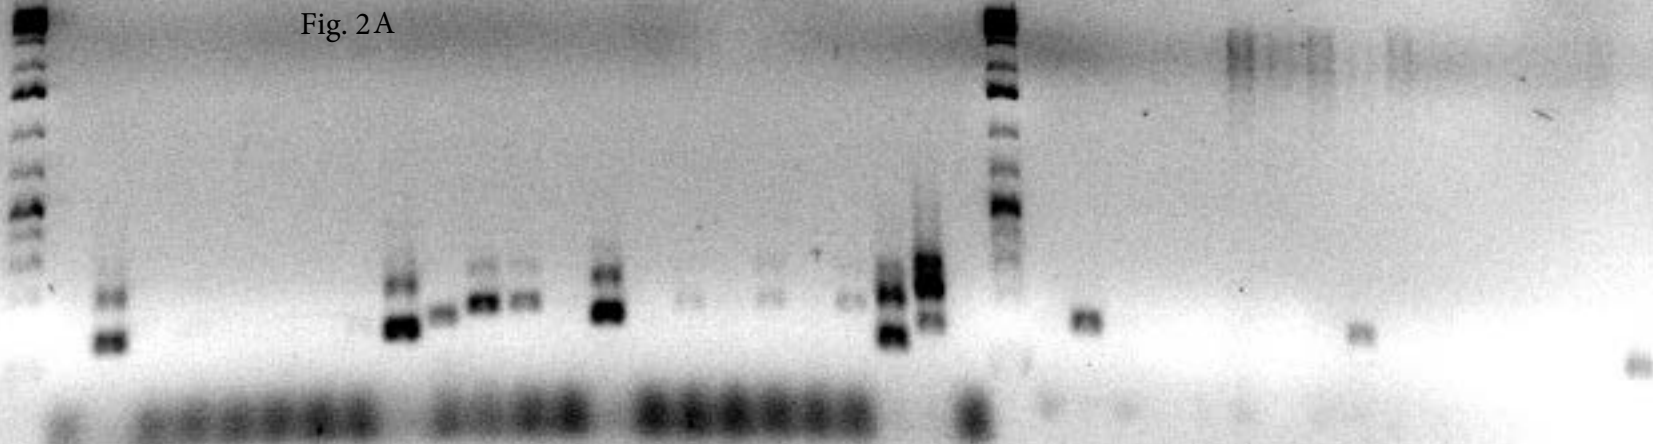

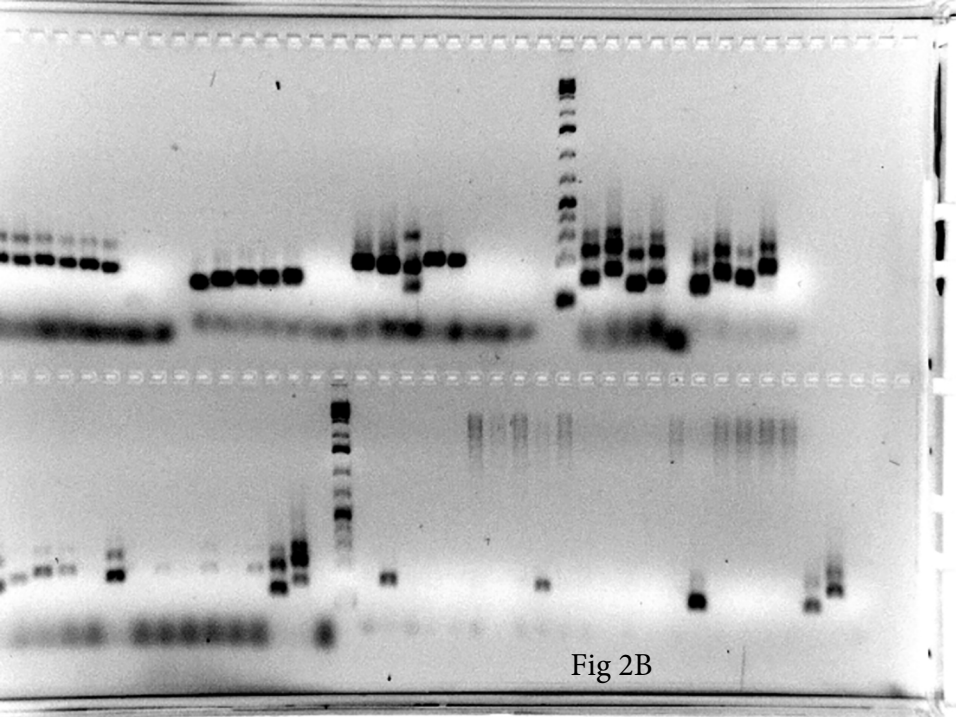

Fig 2B

Fig. 3

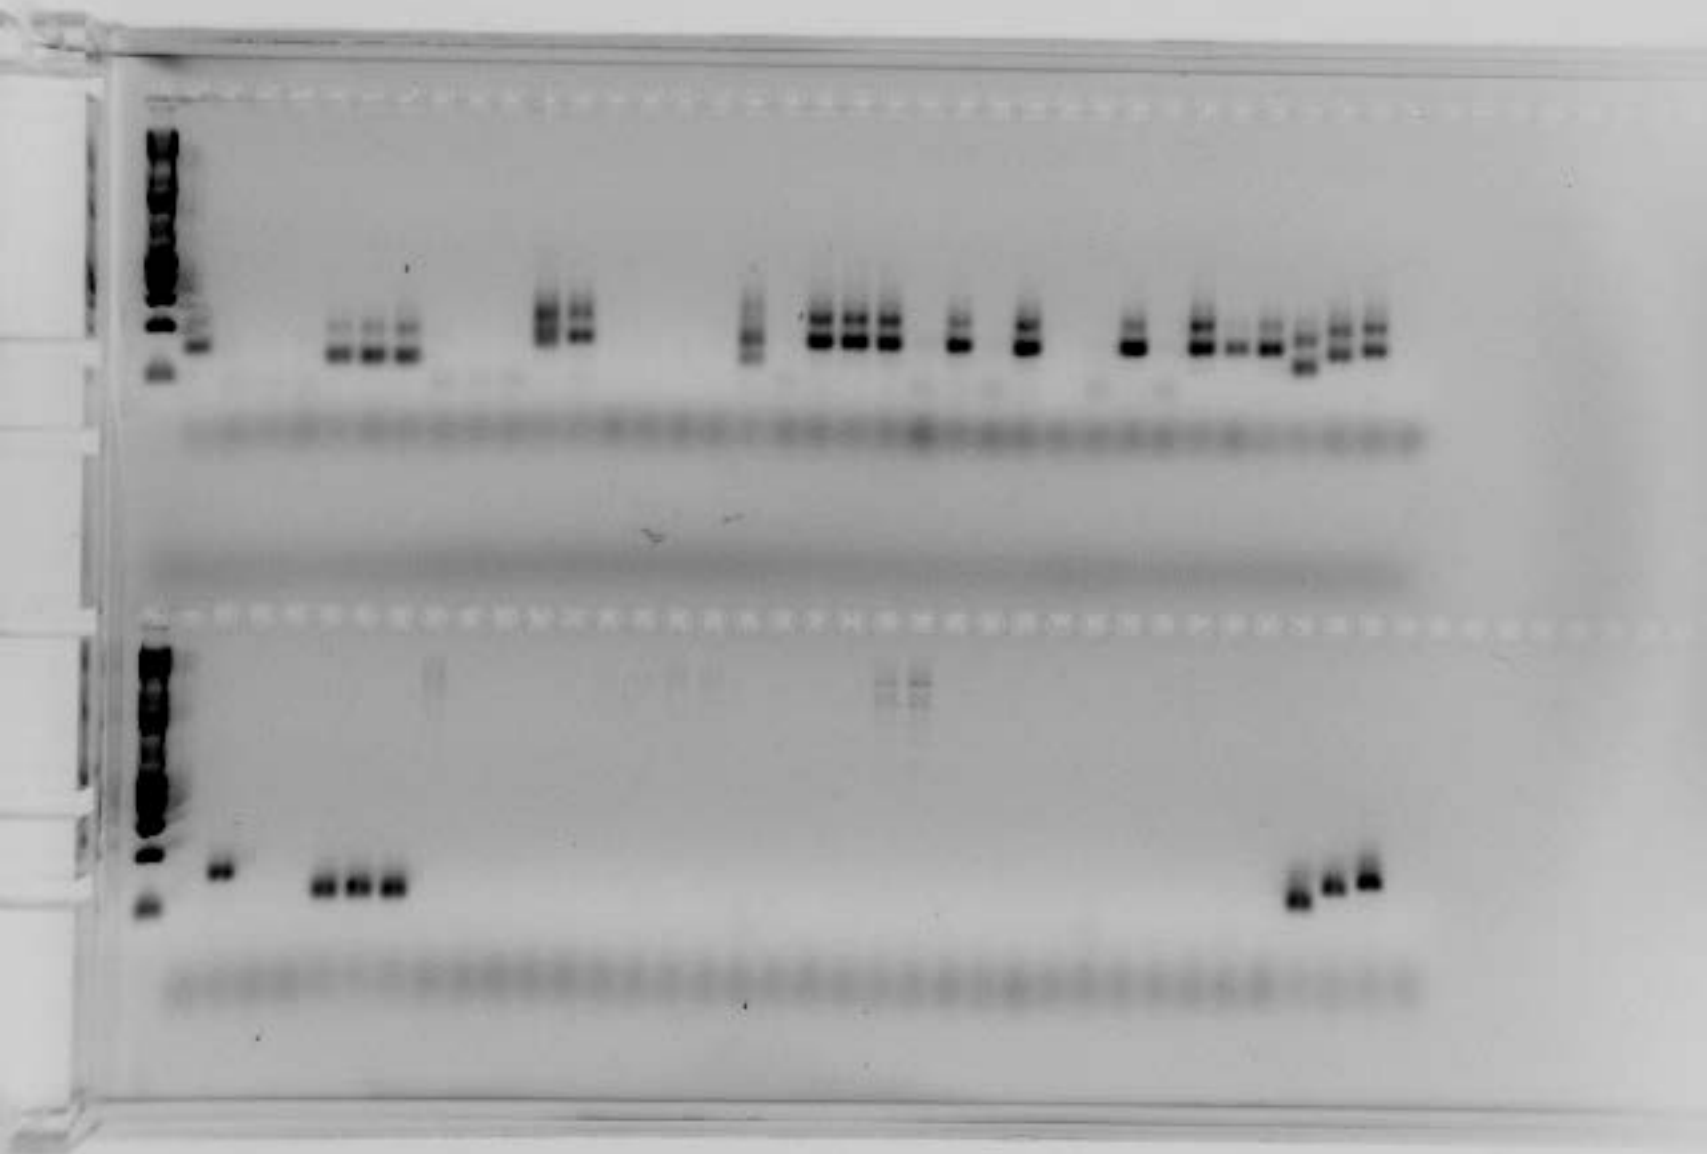

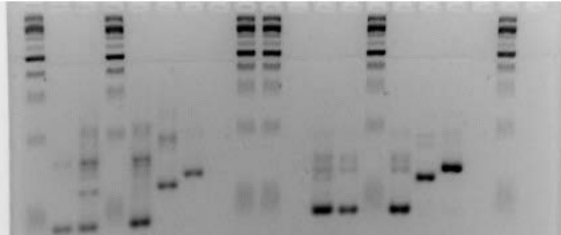

Fig. 4 left

Fig. 4 right

S1 Fig

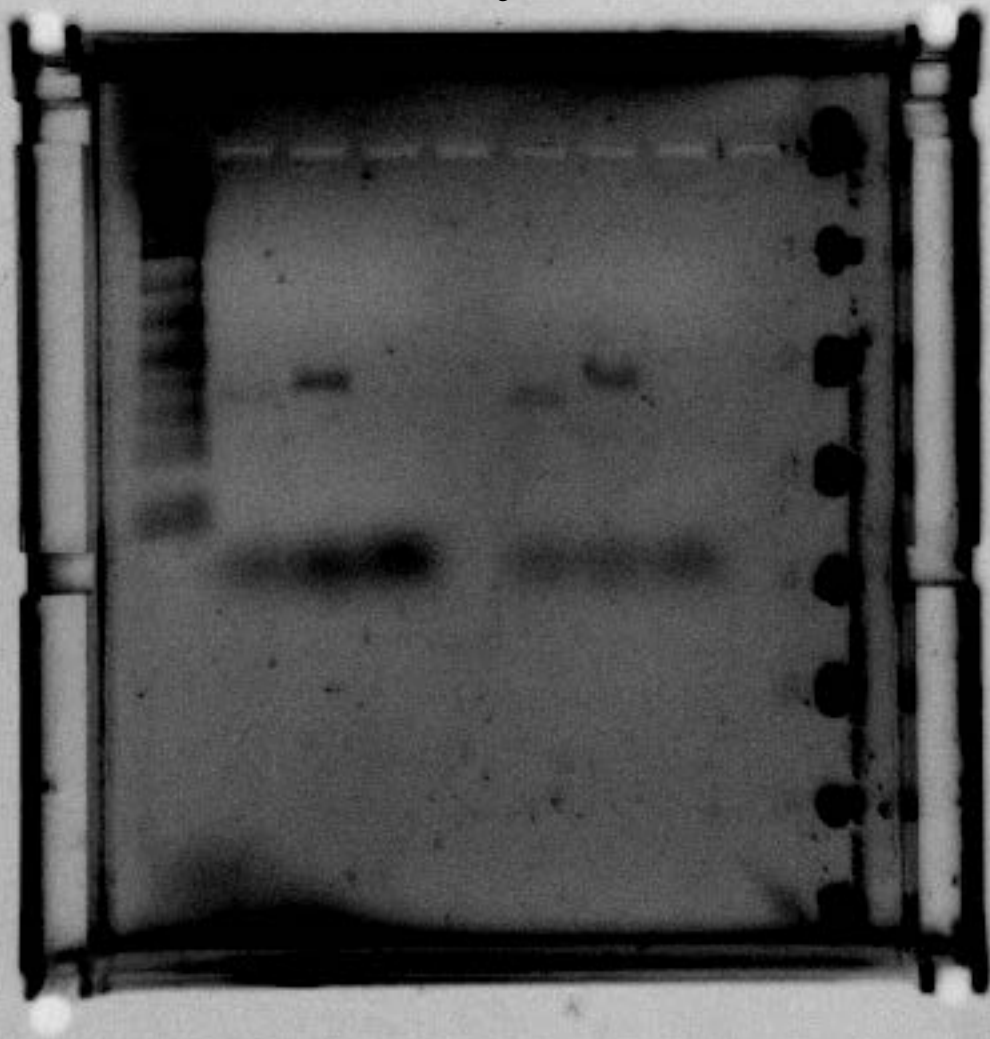

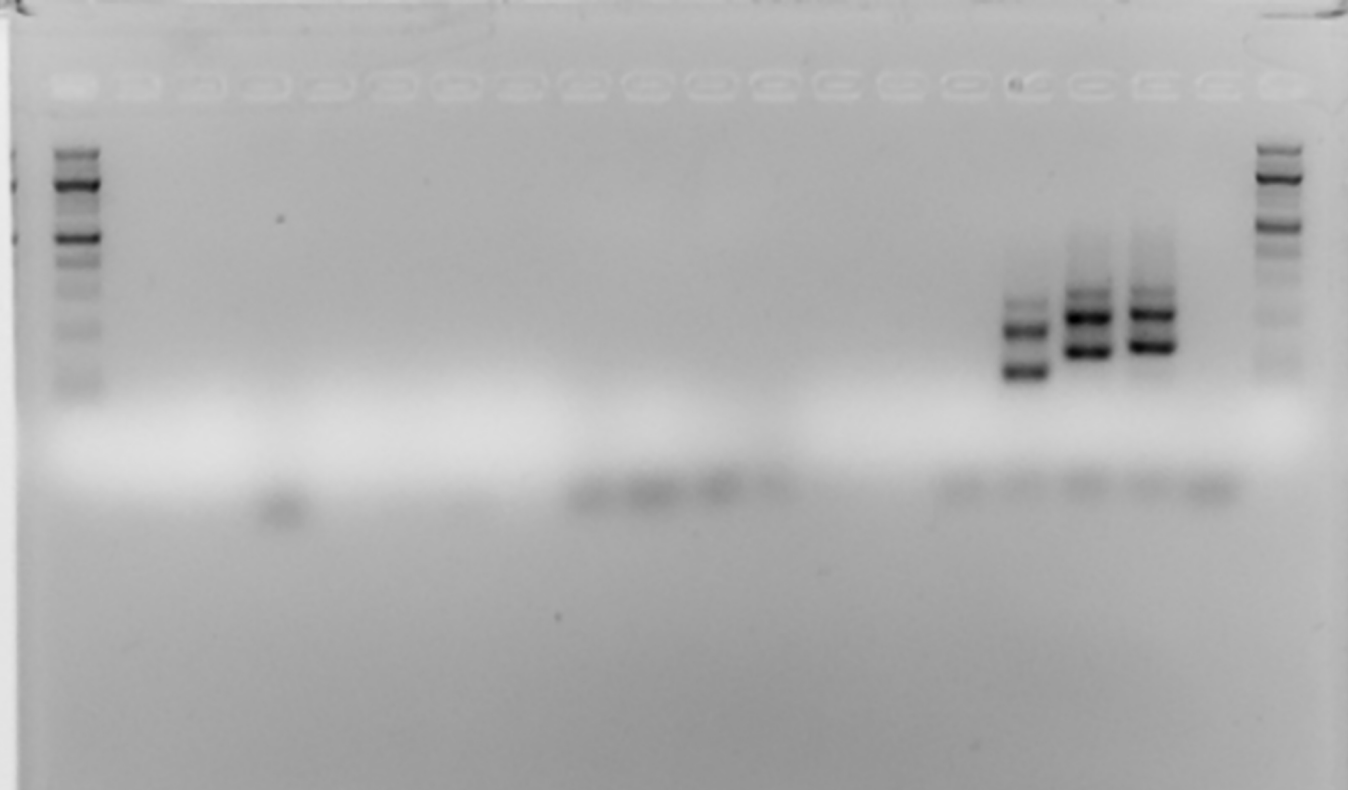

S2 Fig top

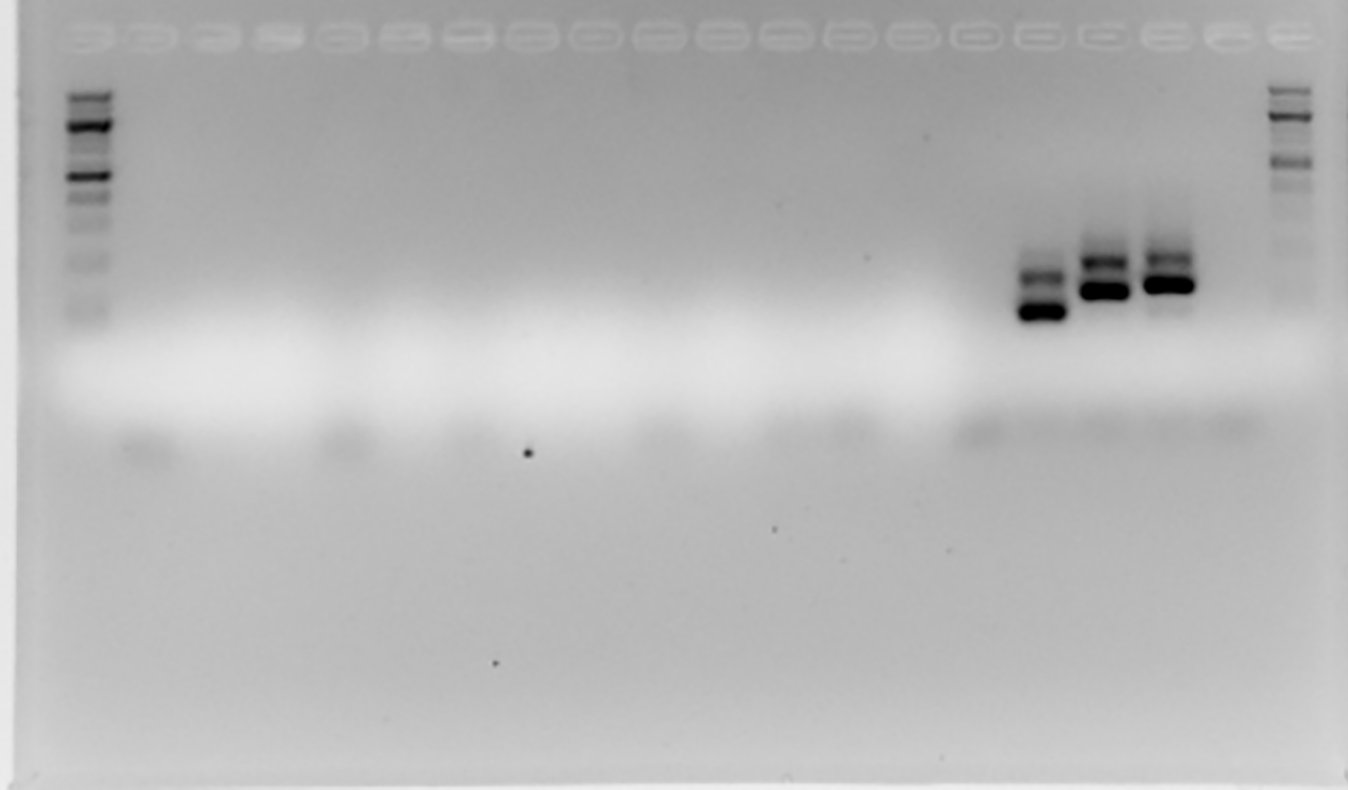

S2 Fig bottom

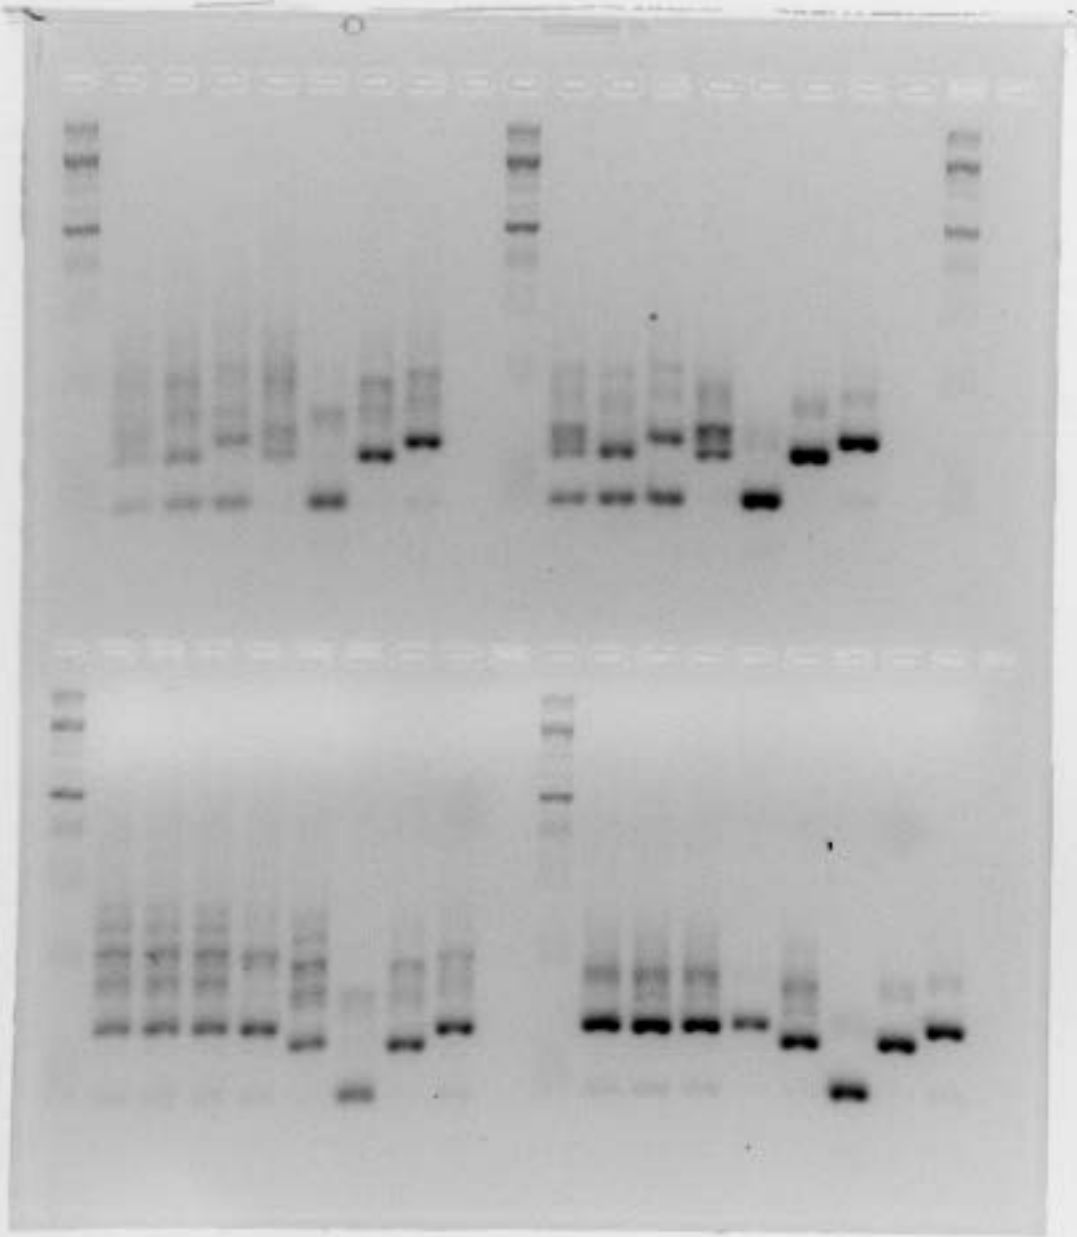

S3 Fig

(top part of gel is figure)
